# Supplementary material for: What Drives False Memories in Psychopathology? A Case for Associative Activation
Source: PubMed Central journal article supplement — Clin Psychol Sci. 2017 Sep 19;5(6):1048–69. doi: 10.1177/2167702617724424 (PMC5665161; doi:10.1177/2167702617724424), 2017-09-19
Supplement: OtgaarSupplemental_Materials.pdf [file OtgaarSupplemental_Materials.pdf]

## Supplemental Material

The below-stated tables include information concerning the effect sizes of the different studies, where this information can be found in the articles and information concerning the p-curve analysis. For more information on analyses, follow this link: <https://osf.io/fdfpj>

| Neutral or Non-Associative Material |          |                    |                                  |                            |             |                                                         |
|-------------------------------------|----------|--------------------|----------------------------------|----------------------------|-------------|---------------------------------------------------------|
| Studies                             | Category | Material           | Cohen's d                        | Number of DRM lists/scenes | Sample size | Journal                                                 |
| Bremner et al. (2000)               | PTSD     | Neutral DRM        | 0.51 (recognition)               | 6 15-word lists            | 63          | Psychological Science                                   |
| Bremner et al. (2000)               | PTSD     | Neutral DRM        | 0.04 (recall)                    |                            |             | Psychological Science                                   |
| Hauschildt et al. (2012)            | PTSD     | Visual neutral DRM | no data*                         | 5 scenes                   | 92          | Consciousness and Cognition                             |
| Triantafyllo u et al. (2015)        | PTSD     | Neutral DRM        | 0.22                             | 4 15-word lists            | 281         | Annals of Clinical Psychiatry                           |
| Jelinek et al. (2009)               | PTSD     | Visual neutral DRM | no data                          | 4 scenes                   | 76          | Journal of Behavior Therapy and Experimental Psychiatry |
| Zoelner et al. (2000)               | PTSD     | Neutral DRM        | no data                          | 24 15-word lists           | 48          | Journal of Abnormal Psychology                          |
| McWilliams et al. (2014)            | PTSD     | Video              | -0.45 (incorrect recall, Exp. 1) |                            | 35          | Behavioral Sciences & the Law                           |
| McWilliams et al. (2014)            | PTSD     | Video              | 0.63 (commission, Exp. 1)        |                            |             | Behavioral Sciences & the Law                           |

|                          |        |                   |                                |                  |     |                                          |
|--------------------------|--------|-------------------|--------------------------------|------------------|-----|------------------------------------------|
| McWilliams et al. (2014) | PTSD   | Video             | 0.5 (incorrect recall, Exp. 2) |                  | 31  | Behavioral Sciences & the Law            |
| McWilliams et al. (2014) | PTSD   | Video             | 0.33 (commission, Exp. 2)      |                  |     | Behavioral Sciences & the Law            |
| Chae et al. (2011)       | PTSD   | Interactive event | -0.06**                        |                  | 322 | Journal of Experimental Child Psychology |
| Chae et al. (2011)       | PTSD   | Interactive event | -0.12                          |                  |     | Journal of Experimental Child Psychology |
| Chae et al. (2011)       | PTSD   | Interactive event | 0.16                           |                  |     | Journal of Experimental Child Psychology |
| Chae et al. (2011)       | PTSD   | Interactive event | 0.21                           |                  |     | Journal of Experimental Child Psychology |
| Howe et al. (2004)       | Trauma | Neutral DRM       | no data                        | 12 14-word lists | 159 | Child Development                        |
| Valentino et al. (2008)  | Trauma | Words             | 0.14 (abused group)            |                  | 284 | Development and Psychopathology          |
| Valentino et al. (2008)  | Trauma | Words             | -0.56 (abused group)           |                  |     | Development and Psychopathology          |
| Valentino et al. (2008)  | Trauma | Words             | -1.13 (abused group)           |                  |     | Development and Psychopathology          |
| Valentino et al. (2008)  | Trauma | Words             | 0.63 (abused group)            |                  |     | Development and Psychopathology          |
| Valentino et al. (2008)  | Trauma | Words             | -0.64 (neglected group)        |                  |     | Development and Psychopathology          |
| Valentino et al. (2008)  | Trauma | Words             | 0.39 (neglected group)         |                  |     | Development and Psychopathology          |
| Valentino et al. (2008)  | Trauma | Words             | -1.09 (neglected group)        |                  |     | Development and Psychopathology          |

|                                                          |        |                      |                                    |                  |     |                                             |
|----------------------------------------------------------|--------|----------------------|------------------------------------|------------------|-----|---------------------------------------------|
| Valentino et al. (2008)                                  | Trauma | Words                | 0.25 (neglected group)             |                  |     | Development and Psychopathology             |
| Eisen et al. (2002)                                      | Trauma | Interactive event    | -0.19 (misleading incorrect)       |                  | 189 | Journal of Experimental Psychology: Applied |
| Eisen et al. (2002)                                      | Trauma | Interactive event    | 0.22 (misleading correct)          |                  |     | Journal of Experimental Psychology: Applied |
| Eisen et al. (2002)                                      | Trauma | Interactive event    | -0.06 (abuse misleading incorrect) |                  |     | Journal of Experimental Psychology: Applied |
| Eisen et al. (2002)                                      | Trauma | Interactive event    | 0.09 (abuse misleading correct)    |                  |     | Journal of Experimental Psychology: Applied |
| Eisen et al. (2007)                                      | Trauma | Interactive event    | -0.27 (overall error misleading)   |                  | 328 | Developmental Psychology                    |
| Eisen et al. (2007)                                      | Trauma | Interactive event    | -0.26 (commission abuse-related)   |                  |     | Developmental Psychology                    |
| <b>Different Types of Emotional Associative Material</b> |        |                      |                                    |                  |     |                                             |
| Moradi et al. (2015)                                     | PTSD   | Trauma-related video | 1.92                               | 4 scenes         | 63  | Journal of Abnormal Psychology              |
| Brennen et al. (2007)                                    | PTSD   | Trauma-related DRM   | 0.65                               | 20 10-word lists | 100 | Consciousness and Cognition                 |
| Hayes et al. (2011)                                      | PTSD   | Trauma pictures      | no data                            |                  | 29  | Journal of Psychiatry Research              |
| Howe et al. (2011)                                       | Trauma | Negative DRM         | no data                            | 8 10-word lists  | 284 | Child Development                           |
| Baugerud et al. (2016)                                   | Trauma | Negative DRM         | 0.59                               | 15 15-word lists | 57  | Journal of Experimental Child Psychology    |
| Goodman et al. (2011)                                    | Trauma | Trauma-related DRM   | 0.77                               | 40 10-word lists | 93  | Development and Psychopathology             |

|                          |            |                         |         |                  |     |                                             |
|--------------------------|------------|-------------------------|---------|------------------|-----|---------------------------------------------|
| Goodman et al. (2011)    | Trauma     | Trauma-related DRM      | 0.57    |                  |     | Development and Psychopathology             |
| Otgaar et al. (in press) | Trauma     | Negative DRM            | 0.61    | 10-10-word lists | 127 | British Journal of Developmental Psychology |
| Moritz et al. (2005)     | Depression | Depression-relevant DRM | 0.56    | 4 12-word lists  | 63  | Depression and Anxiety                      |
| Moritz et al. (2005)     | Depression | Depression-relevant DRM | 0.88    |                  |     | Depression and Anxiety                      |
| Moritz et al. (2008)     | Depression | Negative DRM            | no data | 6 16-word lists  | 43  | Memory                                      |
| Yey and Hua (2009)       | Depression | Negative DRM            | no data | 27 13-word lists | 62  | Depression and Anxiety                      |
| Joormann et al. (2009)   | Depression | Negative DRM            | 0.63    | 40 15-word lists | 52  | Journal of Abnormal Psychology              |
| Toffalini et al. (2014)  | Depression | Negative script         | 1.65    |                  | 60  | Personality & Individual Differences        |
| Howe & Malone (2011)     | Depression | Depression-relevant DRM | 1.10    | 12 10-word lists | 48  | Memory                                      |

| Studies                     | Where can the statistics (e.g., means) be found? | Means                                 | P-curve analysis               | Significant: yes/no |
|-----------------------------|--------------------------------------------------|---------------------------------------|--------------------------------|---------------------|
| Bremner et al. (2000)       | p.335                                            | ,51 (.50) - .53 (.50)                 | no information for recognition |                     |
| Bremner et al. (2000)       | p.335                                            | ,95 (.22) - .78 (.42)                 | $F(3, 59) = 5.79, p = .0007$   | yes                 |
| Hauschildt et al. (2012)    |                                                  |                                       | $F(4, 174) = 1.83, p = .13$    | no                  |
| Triantafyllou et al. (2015) | p.171                                            | 0.89 (0.22) - 0.84 (0.23)             | no information                 |                     |
| Jelinek et al. (2009)       |                                                  |                                       | $F(2, 73) = 1.16, p = .32$ ;   | No                  |
| Zoelner et al. (2000)       |                                                  |                                       |                                |                     |
| McWilliams et al. (2014)    | p.707                                            | see table 1 for the means             | $F(2, 41) = 7.12, p < .01$     | yes                 |
| McWilliams et al. (2014)    | p.707                                            | see table 1 for the means             | no information                 |                     |
| McWilliams et al. (2014)    | p.707                                            | see table 1 for the means             | no information                 |                     |
| McWilliams et al. (2014)    | p.707                                            | see table 1 for the means             | no information                 |                     |
| Chae et al. (2011)          | p.532                                            | see table 4 (0.17 (0.17) - 0.18(0.17) | $F(2, 271) = 70.24, p < .001$  | yes                 |
| Chae et al. (2011)          | p.532                                            | 0,16 (0.16) - 0.18 (0.17)             |                                |                     |
| Chae et al. (2011)          | p.532                                            | 0,21 (0.20) - 0.18 (0.17)             |                                |                     |

|                         |                |                           |                                         |     |
|-------------------------|----------------|---------------------------|-----------------------------------------|-----|
| Chae et al. (2011)      | p.532          | 0.22 (0.21) - 0,18 (0.17) |                                         |     |
| Howe et al. (2004)      |                |                           | F(4, 150)=3.01, p < . 05                | yes |
| Valentino et al. (2008) | p.223, table 2 | 0.37(0.45)- 0.31 (0.42)   | x <sup>2</sup> (2) = 1.24, ns           | no  |
| Valentino et al. (2008) | p.223, table 2 | 0.20 (0.35) - .43 (.46)   |                                         |     |
| Valentino et al. (2008) | p.223, table 2 | .12(.32) -.51(.37)        |                                         |     |
| Valentino et al. (2008) | p.223, table 2 | .64(.48)-.37(.37)         |                                         |     |
| Valentino et al. (2008) | p.223, table 2 | .09(.25) -.31(.42)        |                                         |     |
| Valentino et al. (2008) | p.223, table 2 | .61(.46) -.43(.46)        |                                         |     |
| Valentino et al. (2008) | p.223, table 2 | .17(.24)- .51(.37)        | no information (see e.g., p.187 bottom) |     |
| Valentino et al. (2008) | p.223, table 2 | .47(.44)- .37(.37)        |                                         |     |
| Eisen et al. (2002)     | p.186, table 1 | .21(.21)-.25(.22)         |                                         |     |
| Eisen et al. (2002)     | p.186, table 1 | .78 (.20)-.73(.24)        |                                         |     |
| Eisen et al. (2002)     | p.188, table 3 | .24(.32)-.26(.31)         |                                         |     |
| Eisen et al. (2002)     | p.188, table 3 | .76(.32) - .73(.33)       |                                         |     |

|                          |                 |                                                |                                  |     |
|--------------------------|-----------------|------------------------------------------------|----------------------------------|-----|
| Eisen et al. (2007)      | p.1282, table 2 | .18(.14) - .22(.16)                            | F(8,313) = 1.99, p < .05.        | yes |
| Eisen et al. (2007)      | p.1282, table 2 | .03(.06)-.05 (.09)                             |                                  |     |
|                          |                 |                                                |                                  |     |
| Moradi et al. (2015)     | p.912, table 3  | 48.61(16.35)-22.50(10.15)                      | F(2.51, 153.08) = 6.77, p < .001 | yes |
| Brennen et al. (2007)    | p.881, table 2  | .34(.25) - .19 (.21)                           | F(1, 98) = 7.34, p <.01          | yes |
| Hayes et al. (2011)      |                 |                                                | F(1,27) = 4.19, p < . 0.05,      | yes |
| Howe et al. (2011)       |                 |                                                | no information                   |     |
| Baugerud et al. (2016)   | p.107           | convert partial eta squared = .08 to cohen's d | F(1,54) = 5.26, p = .03          | yes |
| Goodman et al. (2011)    | p.430, table 2  | .16(.17)-.05(.11)                              | F (1,85) = 4.54, p < .05         | yes |
| Goodman et al. (2011)    | p.431, table 3  | .55(.13)-.46(.18)                              | F (1.85) = 4.84, p < .05         | yes |
| Otgaar et al. (in press) | table 2         | .14(.20)-.03(.16)                              | F(1, 118) = 14.43, p < .001      | yes |
| Moritz et al. (2005)     | p.13            | t(51) = 2 (convert into cohen's d)             | F (1,51) = 8.39, p = .006        | yes |
| Moritz et al. (2005)     | p.13            | t(51) = 3.16 (convert into cohen's d)          |                                  |     |
| Moritz et al. (2008)     |                 |                                                | F(2, 82) = .06, p > .09          | no  |
| Yey and Hua (2009)       |                 |                                                | F(2,120) = 51.22, p > .05        | no  |
| Joormann et al. (2009)   | p.415           |                                                | F(2, 100) = 3.47, p < .05,       | yes |
| Toffalini et al. (2014)  | p.16, table 1   | 0.52 (.26) - 0.15 (0.18)                       | F(1,58) = 17.29, p < .001        | yes |
| Howe & Malone (2011)     | p.197, table 1  | .75(.25)-.47(.26)                              | F(1,46) = 3.65, p < .048         | yes |
